# Supplementary material
Source: Research Square preprint supplement (doi:10.21203/rs.3.rs-9902566/v1)
Supplement: Supplementary file 1 [file 7d0830a88557e384a601f1bb.docx]

**Supplementary Materials**

1. **Search Strings**

**1.1 MEDLINE (via PubMed)**

(transplant*) OR (transplantation)) OR (hematopoietic stem cell transplantation)) OR (organ transplantation)) OR (heart-lung transplantation)) OR (lung transplantation)) OR (pancreas transplantation)) OR (liver transplantation)) OR (kidney transplantation)) OR (heart transplantation)) OR (donor*)) OR (organ donors)) OR (donation)) OR (living donor*)) OR (cadaver*)) OR (deceased donor*)) OR (brain death)) OR (cardiac arrest)) OR (procurement)) OR (harvesting)) AND (((((((((((((allied health personnel) OR (nurse*)) OR (nurse practitioners)) OR (nurse clinicians)) OR (nurse specialists)) OR (nurse's role)) OR (nursing)) OR (nurse coordinator*)) OR (transplant nurse*)) OR (advanced practice nurse)) OR (advanced practice nursing)) OR (case managers)) OR (SN-OD))) AND (((((((((((((((((((((((((((((((((((((coordination) OR (transplant coordination)) OR (organ procurement organization)) OR (nursing staff)) OR (nursing services)) OR (nursing specialties)) OR (agencies)) AND (((((((((((((((((((outcome) OR (patient)) OR (treatment) OR (complication*)) OR (graft survival)) OR (patient survival)) OR (immunosuppression) OR (graft rejection)) OR (sex)) OR (gender)) OR (population)))

FILTERS: - - Publication date: from 1954 to 21/05/2025

Article language: English, French, Spanish, German, Italian, and Dutch

RESULTS: **5.387**

- 1. **GOOGLE SCHOLAR**

(transplant OR donor OR "organ transplantation") AND (nurse OR "nursing role" OR "transplant nurse") AND (coordination OR "organ procurement") AND (outcome OR complication OR survival OR immunosuppression OR gender)

FILTERS: - - - Publication date: 1954 to 2025

Article language: any

Article type: scientific publications

RESULTS: **4.330**

- 1. **WEB OF SCIENCE**

(access through UniPi) (((((((((((((((((ALL=(transplant)) OR ALL=(hematopoietic stem cell transplantation)) OR ALL=(organ transplantation)) OR ALL=(organ donation)) OR ALL=(procurement)) OR ALL=(harvesting)) AND ALL=(nurse)) OR ALL=(nurse specialist)) OR ALL=(nurse's role)) OR ALL=(nurse coordinator)) OR ALL=(transplant nurse)) AND ALL=(transplant coordination)) OR ALL=(organ procurement organization)) AND ALL=(outcome)) OR ALL=(treatment)) OR ALL=(complication)) OR ALL=(gender)) OR ALL=(population)

FILTERS: - - - - - Document Type: article Web Of Science Categories: Transplantation Citation Topics Meso: Organ Donation & Transplantation Citation Topics Micro: Liver Transplantation, Cardiothoracic Transplantation, Organ Donation Language: NOT Russian or Japanase

RESULTS: **7.524**

- 1. **SCOPUS**

(access through UniPi) (TITLE-ABS-KEY(transplant) OR TITLE-ABS-KEY(donor) OR TITLE-ABS-KEY(organ) AND TITLE-ABS-KEY(nurse) OR TITLE-ABS-KEY(nursing) OR TITLE-ABS-KEY(transplant AND nurse) AND TITLE-ABS-KEY(coordination) OR TITLE-ABS-KEY(organ AND procurement) AND TITLE-ABS-KEY(outcome) OR TITLE-ABS-KEY(complication) OR TITLE-ABS-KEY(survival) OR TITLE-ABS-KEY(immunosuppression) OR TITLE-ABS-KEY(gender))

RESULTS: **211**

- 1. **COCHRANE**

(transplantation OR organ transplantation OR stem cell transplant OR organ donor OR organ procurement) AND (nurse OR nurse coordinator OR transplant nurse OR advanced practice nurse OR SN-OD OR specialist nurse) AND (coordination OR transplant coordination OR nursing role OR nursing care OR organ procurement organization) AND (outcome OR complication OR graft survival OR patient survival OR immunosuppress OR graft rejection OR mortality OR gender)” FILTRI: - - Publication date: 1954 to 21/05/2025 Document type: Cochrane Reviews, Cochrane Protocols, Trials, Editorials, Special Collections

RESULTS: **84**

**1.6 CINAHL**

(transplantation OR organ transplantation OR stem cell transplant OR organ donor OR organ procurement) AND (nurse OR nurse coordinator OR transplant nurse OR advanced practice nurse OR SN-OD OR specialist nurse) AND (coordination OR transplant coordination OR nursing role OR nursing care OR organ procurement organization) AND (outcome OR complication OR graft survival OR patient survival OR immunosuppress OR graft rejection OR mortality OR gender)

FILTERS: - - Date: 01/01/1954 – 21/05/2025

LANGUAGES: Dutch, English, French, German, Italian, Spanish

RESULTS: **281**
